# Supplementary material
Source: PubMed Central journal article supplement (PMC3989800)
Supplement: supp_113.208728_jpet208728_suppl_figure.pdf [file supp_113.208728_jpet208728_suppl_figure.pdf]

**A Novel Curcumin Derivative CNB001 Mitigates Obesity-Associated Insulin Resistance**

Evgeniy Panzhinskiy, Yinan Hua, Paul A. Lapchak, Elena Topchiy, Teresa E. Lehmann, Jun Ren, Sreejayan Nair

Journal: Journal of Pharmacology and Experimental Therapeutics

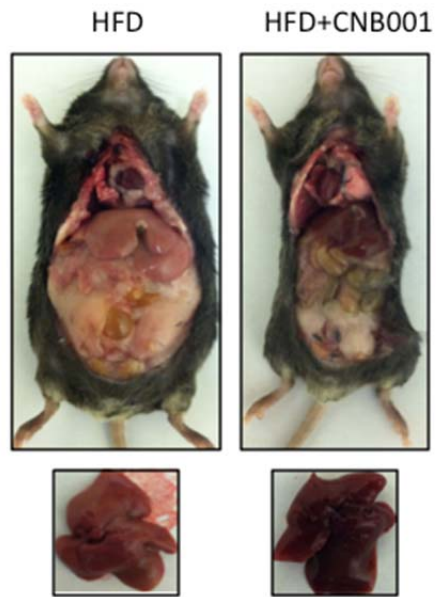

Supplemental Figure 1. Panzhinskiy E et al.

**Supplemental Fig. 1** CNB001 administration prevents fatty liver in high fat diet-fed mice.

Gross anatomy and liver morphology of high fat diet-fed mice received vehicle or CNB001 injections.
